# Supplementary material for: Synthesis of MOF-supported Pt catalyst with high electrochemical oxidation activity for methanol oxidation
Source: Royal Society of Chemistry journal article supplement (doi:10.1039/d4ra06393g), 2024-01-01
Supplement: d4ra06393g1.pdf [file d4ra06393g1.pdf]

## Supplementary Information

### 2.1. Electrochemical characterization

In the study, all electrochemical analyzes were performed with a potentiostat/galvanostat (Gamry Reference 3000) device. For electrochemical measurements, a conventional three-electrode system was used. This electrode system; It consists of working electrode (glassy carbon-GCE), counter electrode (platinum plate) and reference electrode (Ag/AgCl). Before the electrochemical measurements were made, the working electrodes were cleaned with alumina ( $\text{Al}_2\text{O}_3$ ), ultrasonically treated, and then washed with methanol. The resistance measurements of the working electrode were optimized by measuring with a multimeter. Optimized electrocatalyst coating was modified by drop casting method. For the modification solution, 10 mg of NP powder, 500  $\mu\text{L}$  of  $\text{dH}_2\text{O}$ , 37.5  $\mu\text{L}$  of Nafion D-521 and 75  $\mu\text{L}$  of DMF were added and sonicated for 30 min [32]. Then, a three-electrode system was established and cyclic voltammetry (CV), chronoamperometry (CA), 500 cycle, Scan Rate (SR), CO stripping and Impedance (EIS) measurements were performed. Measurements were made in a 1 M KOH solution containing 1 M  $\text{CH}_3\text{OH}$  in the potential range of  $-0.8\text{ V}$  to  $0.2\text{ V}$ . SR measurements to see the activity of the catalyst at different scanning speeds; Scanning rates of 50 mV/s, 100 mV/s, 150 mV/s, 200 mV/s, 250 mV/s were performed in a 1 M KOH solution containing 1 M  $\text{CH}_3\text{OH}$ . At the same time, electrochemical impedance spectroscopy (EIS) measurements were made. EIS measurements were made in a 1 M KOH solution containing 1 M  $\text{CH}_3\text{OH}$  in the frequency range of 10 kHz–0.01 Hz.

### 2.5. Material structure

For the characterization of the obtained nanostructures, the functional groups and elemental characterizations of, Transmission Electron Microscopy (TEM) (Hitachi- HT780), X-Ray

Diffraction (XRD) (Rigaku Miniflex) devices, Scanning Electron Microscope (SEM-EDX mapping) (JEOL JSM-5600LV) were used in the analyses.
